# Supplementary material for: Comparative mitogenomic analyses and gene rearrangements reject the alleged polyphyly of a bivalve genus
Source: PeerJ journal article supplement (doi:10.7717/peerj.13953), 2022-09-26

*Musculista senhousia* -> *Perna viridis*

(a) Family diagram for *M. senhousia*

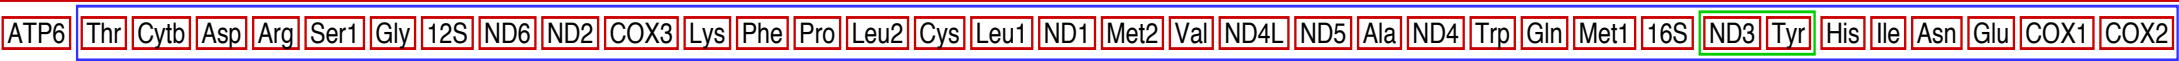

(b) Family diagram for *P. viridis*

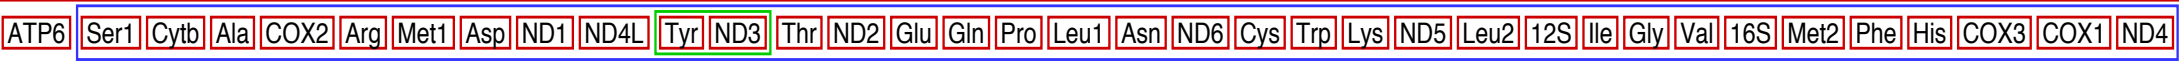

(c) Transposition

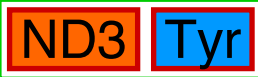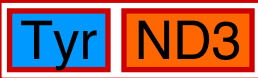

(d) Tandem-Duplication-Random-Loss events (TDRLs)

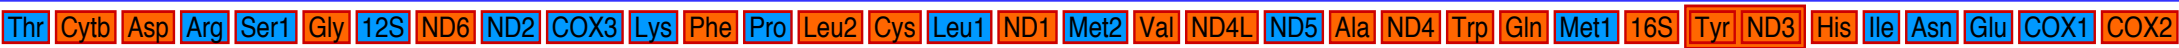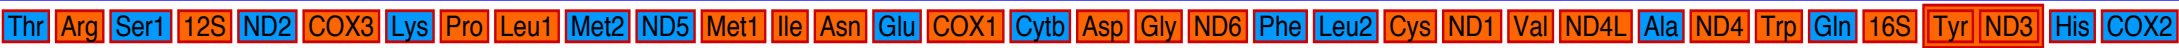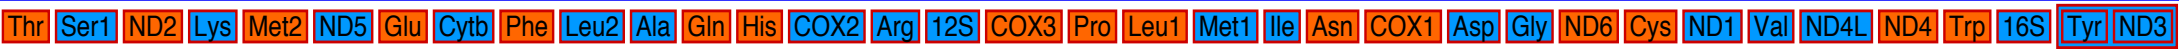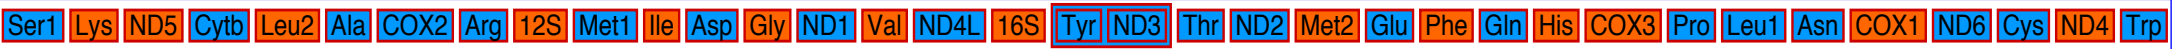

Supplement: Supp_Fig_S1.pdf [file Supp_Fig_S1.pdf]
