# Supplementary material for: Comparative mitogenomic analyses and gene rearrangements reject the alleged polyphyly of a bivalve genus
Source: PeerJ journal article supplement (doi:10.7717/peerj.13953), 2022-09-26

*Perna viridis* -> *Perna canaliculus*, *P. perna* eastern and western SA, Brazil B2

**(a) Family diagram for *P. Viridis***

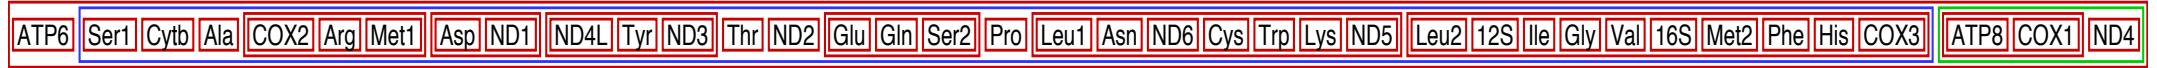

**(b) Family diagram for *P. canaliculus*, *P. perna* eastern and western SA, Brazil B2**

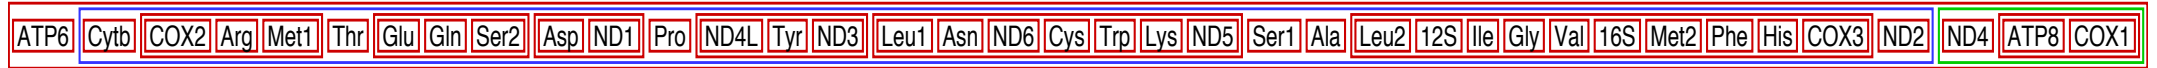

**(c) Transposition**

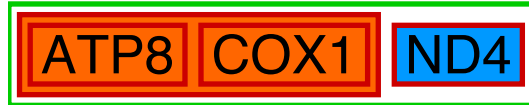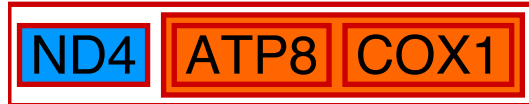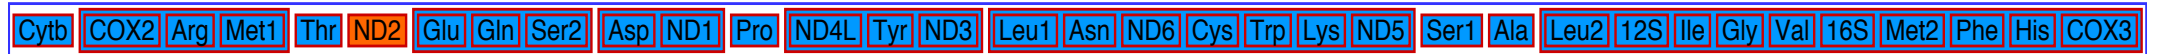

**(d) Tandem-Duplication-Random-Loss events (TDRLs)**

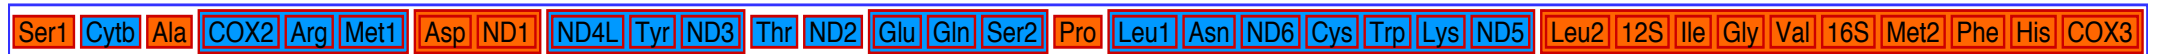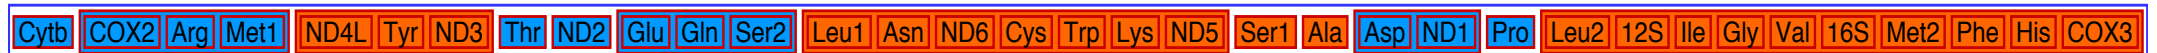

Supplement: Supp_Fig_S2.pdf [file Supp_Fig_S2.pdf]
