# Supplementary material for: Comparative mitogenomic analyses and gene rearrangements reject the alleged polyphyly of a bivalve genus
Source: PeerJ journal article supplement (doi:10.7717/peerj.13953), 2022-09-26

*Limnoperna fortunei* -> *Perna perna* B1

(a) Family diagram for *L. fortunei*

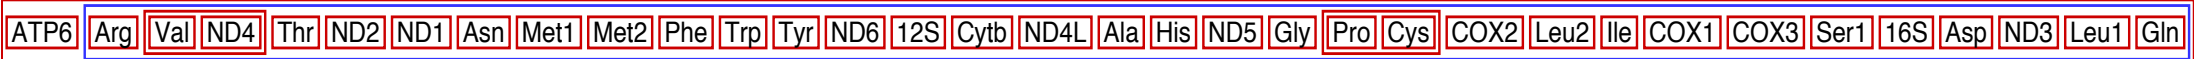

(b) Family diagram for *P. perna* B1

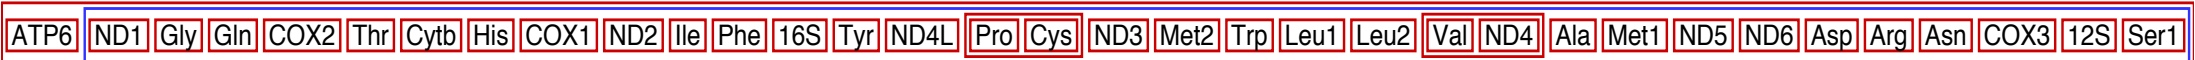

(c) Tandem-Duplication-Random-Loss events (TDRLs)

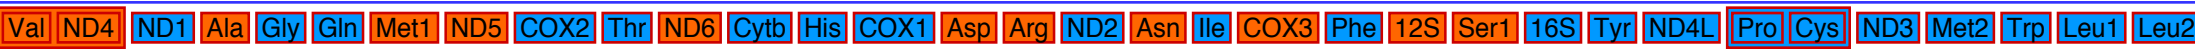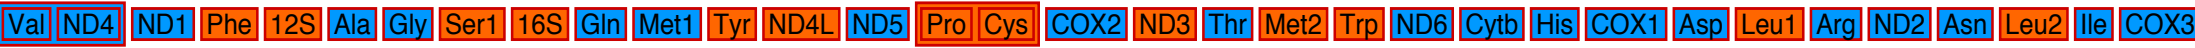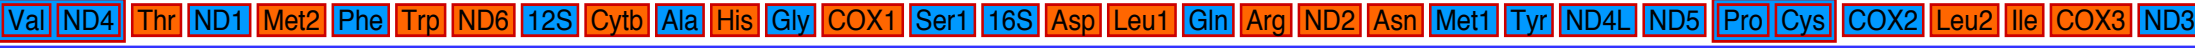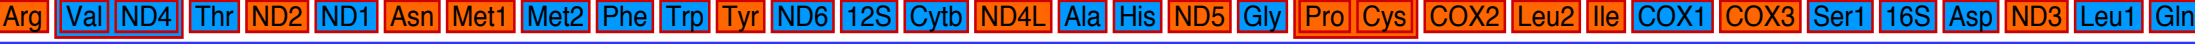

Supplement: Supp_Fig_S3.pdf [file Supp_Fig_S3.pdf]
