# Supplementary material for: Comparative mitogenomic analyses and gene rearrangements reject the alleged polyphyly of a bivalve genus
Source: PeerJ. 2022 Sep 26;10:e13953. doi: 10.7717/peerj.13953 (PMC9521344; doi:10.7717/peerj.13953)
Supplement: Supplemental Information 5 [file peerj-10-13953-s005.xlsx]

## Sheet: Supp_info_Primers_list
Primer pairs	Target zone	Sequence
LCO1490 - Folmer et al. 1994	Cytochrome oxidase subunit I - COI	GGTCAACAAATCATAAAGATATTGG
HCO2198 - Folmer et al. 1994	Cytochrome oxidase subunit I - COI	TAAACTTCAGGGTGACCAAAAAATCA
16Sar-L - Palumbi et al. 1996	16S rRNA	CGCCTGTTTATCAAAAACAT
16Sbr-H - Palumbi et al. 1996	16S rRNA	CCGGTYTGAACTCAGATCAYGT
cytb4_EW-F	Cytochrome b + tRNA Glu ± 3,000bp	TGTTAATCCTGAGTTAGTAGTTAAT
Glu_EW-R	Cytochrome b + tRNA Glu ± 3,000bp	ACATTTATAGTAAAGTTAGCAGCCC
nd1_EW-F	ND1 + 16S rRNA ± 7,000bp	AGCCTGGCTATGCCAATTTATTGCC
16Sbr-H	ND1 + 16S rRNA ± 7,000bp	CCGGTYTGAACTCAGATCAYGT
COX2_EW-F	COX2 + tRNA Glu ± 2,000bp	GCAGATATTAGAGTATGTGTGGA
Glu_EW-R	COX2 + tRNA Glu ± 2,000bp	ACATTTATAGTAAAGTTAGCAGCCC
Pro_EW-F	tRNA Pro + 16S rRNA ±5,000bp	TTGCTTAGAGTAATACTAAGGA
16S_3_EW-R	tRNA Pro + 16S rRNA ±5,000bp	TACTTTCAGCTTATCCCAAAAGT
Arg_EW-F	tRNA Arg + + tRNA Glu ± 1,130bp	AAATCTTAGCTATAAGGCATTTT
Glu_EW-R	tRNA Arg + + tRNA Glu ± 1,130bp	ACATTTATAGTAAAGTTAGCAGCCC
ND3_EW-F	ND3 + 12S rRNA ±3,400bp	TCTTTATTAATGCCTGTAGTAAC
12S_EW-R	ND3 + 12S rRNA ±3,400bp	CAATTTAGAGGAAACAACCATAC
ND6_EW-F	ND6 + tRNA Leu ± 2,300bp	CCAAATGAAATGTATGATTTTAA
Leu_EW-R	ND6 + tRNA Leu ± 2,300bp	ATTCGCATTAATTCTGCCAGACG
COI_3_EW-F	COI ± 500bp	AATTATTTCTGTACCTGTTCTTGCT
COI_2_EW-R	COI ± 500bp	TCACATAATACGTGTCATGAAG
ATP6_EW-F	ATP6 + Cytb ± 300bp	CTTGTGGATTTGTGGTGGTTAGA
Cyt_GB-R	ATP6 + Cytb ± 300bp	TTAATAGGACAAGGAAGATCATA
ND5_EW-F	ND5 ±1,200bp	GTGTTTATTTTCTAGAGTTCATG
ND5_EW-R	ND5 ±1,200bp	TAAAATTCCTCCTAGAAATACAG
ND4_B1-F	ND4 + COI 2,190bp	TTAACTGTTTTAGAATTAGGGAT
COI_B1-R	ND4 + COI 2,190bp	ACAGAATCTTTTCCAGAATAATG
NAD2_2_EW-F	ND2 + ND4 ±1,300bp	CAGAATTCTGTTCGGGGGATAG
ND4_E2_R	ND2 + ND4 ±1,300bp	CACCCTAACATTACTAACCTTAT
NAD4_E2-F	ND4 ±750bp	GGCGGGAGGATAAGATATGACTT
ND4_E2-R	ND4 ±750bp	CACCCTAACATTACTAACCTTAT
cytb4_EW-F	Cytb + tRNA Glu ± 1,900bp	TGTTAATCCTGAGTTAGTAGTTAAT
Glu_EW-R	Cytb + tRNA Glu ± 1,900bp	ACATTTATAGTAAAGTTAGCAGCCC
COX2_B1-F	COX2 + tRNA Met ±750bp	CGGGATTCAGGCGTTGAGTTAGA
Met_B1-R	COX2 + tRNA Met ±750bp	TCCTAAAATTAGATCACTTTACC
ND5_B1-F	ND2 + ND5 ± 3,600bp	CTGTGTTCCTTTTTTGTAATTAA
ND2_B1-R	ND2 + ND5 ± 3,600bp	CTTTGAGCAACACAACAACCTTC
Cytb_B1-F	Cytb ± 2,000bp	AAATTTAACTTTATTTAAATATT
Cytb_B1-R	Cytb ± 2,000bp	GGGTAAAATGCTAAGCTCCGGAATTT
ND4_2_B1-F	ND4 + COI 1,400bp	TCAATGGTCTTAGCTGGTGTTGT
COI_2_B1-R	ND4 + COI 1,400bp	CAGAACCTTAGGTTATTTAATCG
12S_B1-F	12S rRNA + COX3 ± 2,500bp	TGATCCACCTGAATTATGCCTTTCC
COX3_B1-R	12S rRNA + COX3 ± 2,500bp	GATTAATCAAGTTGTTCCCACTATGACATG
NUC2_2_B1-F	tRNA Gln + ND6 ± 2,700bp	GTAATGAGAGTATTGACGTCTTGAG
ND6_B1-R	tRNA Gln + ND6 ± 2,700bp	AACACAAAAACATCTCAATATCC
ND4_2_B1-F	ND4 + COI 1,400bp	TCAATGGTCTTAGCTGGTGTTGT
COI_3_B1-R	ND4 + COI 1,400bp	GATTAAATCACACCCTCCGATACACAAAG
ATP6_B1-F	ATP6 + Cytb ± 1,000bp	GTCTTTACGCTGACGAGCATAGAAAATAAT
Cytb_B1-R	ATP6 + Cytb ± 1,000bp	GGGTAAAATGCTAAGCTCCGGAATTT
COI_B1-F	COI + Cytb ± 1,500bp	CGGTAGGATTGAATGTAGATACT
Cytb_2_B1-R	COI + Cytb ± 1,500bp	ACGAAAAGGAAGAAGTTTTTCAGAC
ND6_B1-F	ND6 + ND5 ±780bp	GGGTTTATTGGATATTGAGATGTTTTTG
ND5_B1-R	ND6 + ND5 ±780bp	CCATCTCCAACTCGATTAGTTAAAGC
NUC2_2_B1-F	tRNA Gln + ND3 ± 2,000bp	GTAATGAGAGTATTGACGTCTTGAG
ND3_B1-R	tRNA Gln + ND3 ± 2,000bp	CATTAAACCACTCAATTTAAAGACCC
16S_B1-F	16S rRNA + tRNA Phe ± 1,000bp	CAAGGTGAAAGTGACATGCTATTTGC
Phe_B1-R	16S rRNA + tRNA Phe ± 1,000bp	CACCTCTCTCATTTTCAATAAGATGC
ND1_B1-F	ND1 + ND3 ± 1,500bp	GATATTAACTTGTGGTTTGATGCAG
ND3_B1-R	ND1 + ND3 ± 1,500bp	CATTAAACCACTCAATTTAAAGACCC
Asn_B1-F	tRNA Asn + ND5 ±1,200bp	TGTTAATTTAGGATTGTCTAAAGACCGG
ND5_B1-R	tRNA Asn + ND5 ±1,200bp	CCATCTCCAACTCGATTAGTTAAAGC
